# 1 **Decynium-22 affects behavior in the** 2 **zebrafish light/dark test**

3  
4 Caio Maximino

5 Laboratório de Neurociências e Comportamento “Frederico Guilherme Graeff”, Faculdade de  
6 Psicologia, Instituto de Estudos em Saúde e Biológicas, Universidade Federal do Sul e Sudeste do  
7 Pará

8 Avenida dos Ipês, S/N – Marabá/PA, Brazil

9 [cmaximino@unifesspa.edu.br](mailto:cmaximino@unifesspa.edu.br)

# 10 Decynium-22 affects behavior in the 11 zebrafish light/dark test

12 Decynium-22 (D-22) is an inhibitor of the uptake<sub>2</sub> system of monoamine clearance, resulting in  
13 increased levels of dopamine, norepinephrine, and serotonin in the nervous system and elsewhere.  
14 Uptake<sub>2</sub> is mediated by low-affinity, high-capacity transporters that are inhibited by  
15 glucocorticoids, suggesting a mechanism of fast glucocorticoid-monoamine interaction in the brain.  
16 D-22 dose-dependently increased anxiety-like behavior in adult zebrafish exposed to the light/dark  
17 test, monotonically increasing scototaxis (dark preference), but affecting risk assessment with an  
18 inverted-U-shaped response. These results suggest that the uptake<sub>2</sub> system has a role in defensive  
19 behavior in zebrafish, presenting a novel mechanism by which stress and glucocorticoids could  
20 produce fast neurobehavioral adjustments in vertebrates. **Data:**  
21 <https://github.com/lanec-unifesspa/decynium22>

22  
23 **Keywords:** Uptake<sub>2</sub>, Monoamines, Stress, Defensive behavior, Zebrafish  
24

## 25 1. Introduction

26 Clearance of the monoamine neurotransmitters dopamine (DA), norepinephrine (NE), and serotonin  
27 (5-HT) released in the synaptic cleft is executed by two distinct mechanisms, uptake<sub>1</sub> and uptake<sub>2</sub>  
28 (Daws 2009a). Uptake<sub>1</sub> is mediated by high-affinity, low-capacity transporters which include the  
29 NE transporter (SLC6A2, NET), the DA transporter (SLC6A3, DAT), and the serotonin transporter  
30 (SCL6A4, SERT)(Rudnick *et al.* 2014). This SLC6A family has been implicated in the  
31 pathophysiology of mental disorders, including alterations of anxiety (Mohammad *et al.* 2016;  
32 Sullivan *et al.* 1999; Maximino 2012), and are the target for major classes of anxiolytic drugs,  
33 including tricyclic antidepressants, selective 5-HT reuptake inhibitors, and 5-HT-NE reuptake  
34 inhibitors (Gorman 2002). Uptake<sub>2</sub> is mediated by low-affinity, high-capacity transporters which  
35 include organic cation transporters (OCT1-3; SLC22A1-3) and the plasma membrane monoamine  
36 transporter (PMAT; SLC29A4) (Wu *et al.* 1998; Zhou *et al.* 2007). Evidence has suggest that  
37 uptake<sub>2</sub> plays significant roles in the regulation of monoaminergic neurotransmission and

38 maintenance of homeostasis (Hagan *et al.* 2011; Zhu *et al.* 2012; Rahman *et al.* 2008; Daws *et al.*  
39 2013; Wulsch *et al.* 2009; Horton *et al.* 2013; Kitaichi *et al.* 2005; Schildkraut and Mooney 2004).  
40 Uptake<sub>2</sub> is an interesting system because not only it is a system best suited for extraneuronal uptake  
41 (due to its low-affinity, high-capacity, “promiscuous” characteristic), but also because it is blocked  
42 by glucocorticoids (Hill *et al.* 2011; Wu *et al.* 1998). As a result, uptake<sub>2</sub> represents an intersection  
43 in the pathophysiology of stress and anxiety, a mechanism by which circulating glucocorticoids  
44 (GCs) can rapidly increase monoamine levels in the brain (Maximino 2012). Uptake<sub>2</sub> has been  
45 shown to participate in anxiety-like behavior: SLC22A3 knockout mice show decreased anxiety-  
46 like behavior in the open field test and in the elevated plus-maze (Wulsch, Grimberg, Schmitt,  
47 Painsipp, Wetzstein, Frauke, et al., 2009; but see Vialou et al., 2008). Knockdown of SLC22A3  
48 expression in the brains of mice decreases immobility time in the forced swimming test (Kitaichi *et*  
49 *al.* 2005), a screen for antidepressant-like effects (Willner 1984). Finally, while decynium-22 (D-  
50 22), an uptake<sub>2</sub> inhibitor, had no behavioral effect by itself, co-treatment with fluvoxamine  
51 produced synergistic effects on 5-HT clearance and immobility in the forced swimming test (Horton  
52 *et al.* 2013).

53 Zebrafish (*Danio rerio* Hamilton 1822) have been proposed as model organisms in the study of  
54 behavioral functions and its disorders (Stewart *et al.* 2015; Gerlai 2014; Maximino *et al.* 2010b;  
55 Rinkwitz *et al.* 2011). The advantages of using this species in behavioral studies stem from its use  
56 in developmental biology (i.e., small size, fast generation times, high reproduction rates) and the  
57 availability of tools to image and manipulate its nervous system (Rinkwitz *et al.* 2011). Zebrafish  
58 demonstrate a robust endocrine response to acute stressors (Idalencio *et al.* 2017b; Idalencio *et al.*  
59 2015; Tran *et al.* 2014; Fuzzen *et al.* 2010); importantly, simple acute stressors such as net chasing  
60 induce robust behavioral responses which are blocked by 5-HT reuptake inhibitors (Giacomini *et*  
61 *al.* 2016; Abreu *et al.* 2017) and DAergic and NErgic drugs (Idalencio *et al.* 2017a; Idalencio *et al.*  
62 2015).

63 Currently, it is unknown whether zebrafish possess a functional uptake<sub>2</sub> system. 14 *slc22* genes have  
64 been identified in zebrafish, and OCT3 appears absent (Popović 2014); *oct1* shows moderate  
65 expression in the brain, suggesting a role in neurotransmitter homeostasis (Popović 2014). No  
66 current information exists for PMAT as well. Nonetheless, the interplay between serotonin,  
67 dopamine, and cortisol in behavioral responses to threatening and stressful stimuli in zebrafish (see  
68 Soares, Gerlai, & Maximino, 2018, for a review) suggests a participation of uptake<sub>2</sub>. Here, we show  
69 that D-22 dose-dependently increases anxiety-like behavior in the zebrafish light/dark test (LDT).  
70 These results suggest that uptake<sub>2</sub> is present in this species, and that it functions as a mediator of  
71 stress and defensive behavior.

72 This manuscript is a complete report of all the studies performed to test the hypothesis of a dose-  
73 dependent effect of D-22 on anxiety-like behavior. We report all data exclusions (if any), all  
74 manipulations, and all measures in the study.

75

## 76 **2. Materials and methods**

### 77 **2.1. Animals and housing**

78 A total of 100 animals were used. Animals were bought from a commercial vendor and arrived in  
79 the laboratory with an approximate age of 3 months (standard length =  $13.2 \pm 1.4$  mm), and were  
80 quarantined for two weeks; the experiment began when animals had an approximate age of 4  
81 months (standard length =  $23.0 \pm 3.2$  mm). Animals were kept in mixed-sex tanks during  
82 acclimation, with an approximate ratio of 50-50 males to females (confirmed by body morphology).  
83 Adult zebrafish from the wildtype strain (longfin phenotype) were used in the experiments. Outbred  
84 populations were used for increased genetic variability, thus decreasing the effects of random  
85 genetic drift which could lead to the development of uniquely heritable traits (Parra *et al.* 2009;  
86 Speedie and Gerlai 2008). Thus, the animals used in the experiments were expected to better  
87 represent the natural populations in the wild. The breeder was licensed for aquaculture under  
88 Ibama's (Instituto Brasileiro do Meio Ambiente e dos Recursos Naturais Renováveis) Resolution  
89 95/1993. Animals were group-housed in 40 L tanks, with a maximum density of 25 fish per tank,  
90 for at least 2 weeks before experiments begun. Tanks were filled with non-chlorinated water at  
91 room temperature (28 °C) and a pH of 7.0-8.0. Lighting was provided by fluorescent lamps in a  
92 cycle of 14-10 hours (LD), according to standards of care for zebrafish (Lawrence 2007). Water  
93 quality parameters were as follows: pH 7.0-8.0; hardness 100-150 mg/L CaCO<sub>3</sub>; dissolved oxygen  
94 7.5-8.0 mg/L; ammonia and nitrite < 0.001 ppm. All manipulations minimized their potential  
95 suffering of animals, and followed Brazilian legislation (Conselho Nacional de Controle de  
96 Experimentação Animal - CONCEA 2017). Animals were used for only one experiment and in a  
97 single behavioural test, to reduce interference from apparatus exposure. Experiments were approved  
98 by UEPA's IACUC under protocol 06/18.

99

### 100 **2.2. Sample size calculation and exclusion criteria**

101 Sample sizes were calculated based on a power analysis, using the effects of fluoxetine on the light/  
102 dark test (Maximino *et al.* 2013) as estimates of effect sizes. Using an effect size of 0.7, a

103 significance level of 0.005, and a power of 90%, a sample size of 11 animals per group was  
104 calculated. Final sample sizes were 20 animals/group. Animals were excluded if they displayed  
105 signals of overt ataxia (swimming on a side, swimming upside-down, vertical swimming; Demin et  
106 al., 2017) during the exposure period. Outliers were detected using an *a priori* rule based on median  
107 absolute deviation (MAD) of time on white (the main endpoint of the LDT), with values above or  
108 below 3 MADs being removed (Leys *et al.* 2013).

109

## 110 **2.3. Drug treatments**

111 Zebrafish were randomly drawn from the holding tank immediately before injection and assigned to  
112 four independent groups ( $n = 20$ /group). Animals were injected with vehicle (Cortland's salt  
113 solution) D-22 (0.01, 0.1, 1, or 10 mg/kg). The injection volume was 1  $\mu$ L/0.1 g b.w. (Kinkel et al.  
114 2010). The order with which groups were tested was randomized via generation of random numbers  
115 using the randomization tool in <http://www.randomization.com/>. Experimenters were blind to  
116 treatment by using coded vials for drugs. The data analyst was blinded to phenotype by using  
117 coding to reflect treatments in the resulting datasets; after analysis, data was unblinded.

118

## 119 **2.4. Light/dark test**

120 The light/dark preference (scototaxis) assay was performed as described elsewhere (Maximino,  
121 2018 [<https://10.17504/protocols.io.srfed3n>]; Maximino et al., 2010b). Briefly, 30 min after  
122 injection animals were transferred individually to the central compartment of a black/white tank (15  
123 cm height X 10 cm width X 45 cm length) for a 3-min acclimation period, after which, the doors  
124 which delimit this compartment were removed and the animal was allowed to freely explore the  
125 apparatus for 15 min. While the whole experimental tank was illuminated from above by a  
126 homogeneous light source, due to the reflectivity of the apparatus walls and floor average  
127 illumination (measured just above the water line) above the black compartment was  $225 \pm 64.2$   
128 (mean  $\pm$  S.D.) lux, while in the white compartment it was  $307 \pm 96.7$  lux. The following variables  
129 were recorded:

- 130 1. *Time spent on the white compartment*: the time spent in the white half of the tank (s);
- 131 2. *Transitions to white*: the number of entries in the white compartment made by the animal  
132 throughout the session;
- 133 3. *Entry duration*: the average duration of an entry (time on white / transitions);
- 134 4. *Erratic swimming*: defined as the number of zig-zag, fast, and unpredictable swimming  
135 behavior of short duration;

- 136 5. *Freezing*: the duration of freezing events (s), defined as complete cessation of movements  
137 with the exception of eye and operculum movements;  
138 6. *Thigmotaxis*: the duration of thigmotactic events (s), defined as swimming in a distance of 2  
139 cm or less from the white compartment's walls;  
140 7. *Frequency of risk assessment*: defined as a fast (<1 s) entry in the white compartment  
141 followed by re-entry in the black compartment, or as a partial entry in the white compartment  
142 (i.e., the pectoral fin does not cross the midline);  
143

145 A digital video camera (Samsung ES68, Carl Zeiss lens) was installed above the apparatus to record  
146 the behavioral activity of the zebrafish. Two independent observers, blinded to treatment, manually  
147 measured the behavioral variables using X-Plo-Rat 2005 ([https://github.com/lanec-unifesspa/x-plo-](https://github.com/lanec-unifesspa/x-plo-rat)  
148 [rat](https://github.com/lanec-unifesspa/x-plo-rat)). Inter-observer reliability was at least > 0.95.

149

## 150 2.5. Data analysis

151 Drug effects were assessed using asymptotic general independence tests, using the R package 'coin'  
152 (Hothorn *et al.* 2006). Post-hoc analysis was made using pairwise permutation tests with correction  
153 for the false discovery rate. Data were presented as Cumming estimation plots, with Hedges' *g* used  
154 to estimate effect sizes. Cumming estimates were made using 5000 bootstrap, and confidence  
155 intervals were bias-corrected and accelerated.

156

## 157 3. Results

158 4 animals were removed from analysis in the highest dose group due to overt ataxia, and 1 animal  
159 was removed from the 1 mg/kg group for the same reason. 5 animals (2 in the 0.1 mg/kg group, 1 in  
160 the 1 mg/kg group, and 1 in the 10 mg/kg group) were detected as outliers and removed from  
161 further analysis. A dose-dependent decrease in time on white was found ( $\max T = -3.773$ ,  $p =$   
162  $0.0007$ ; Figure 1B); significant effects were found for 0.1-10 mg/kg. Likewise, dose-dependent  
163 decreases were found for transitions to white ( $\max T = 4.0277$ ,  $p = 0.0003$ ; Figure 1C); significant  
164 effects were found for all doses, except 0.1 mg/kg. No significant effects were found for entry  
165 duration ( $\max T = 1.8191$ ,  $p = 0.2779$ ; Figure 1D). An inverted-U-shaped response was found for  
166 risk assessment ( $\max T = 4.6248$ ,  $p = 0.019$ ; Figure 1E), with 0.1, and 1 mg/kg increasing risk  
167 assessment, and 0.01 mg/kg having no effect; the effect of 10 mg/kg was smaller than the other  
168 effects. A main effect of dose was found in erratic swimming ( $\max T = 3.106$ ,  $p = 0.0091$ ; Figure

169 1F), but *post-hoc* comparisons failed to detect differences. No effects were found for thigmotaxis  
170 (maxT = 2.1474,  $p = 0.1396$ ; Figure 1G) or freezing (maxT = 2.0629,  $p = 0.1688$ ; Figure 1H).  
171

## 172 4. Discussion

173 The present experiment showed evidence that D-22, an uptake<sub>2</sub> inhibitor, dose-dependently  
174 increased anxiety-like behavior in the LDT in unstressed zebrafish. Dose-dependent effects were  
175 found for time on white (scototaxis) and risk assessment, with the latter suggesting better effects at  
176 intermediate doses (0.1 and 1 mg/kg). No effects were observed in other variables (freezing and  
177 erratic swimming, thigmotaxis).

178 The LDT has been proposed as a screening test for anxiolytic-like and anxiogenic-like effects of  
179 treatments in adult zebrafish (Maximino *et al.* 2010a). The test shows good predictive validity,  
180 being sensitive to agents that act at different targets (Kysil *et al.* 2017). The main endpoint of this  
181 test, scototaxis, is sensitive to anxiolytic-like and anxiogenic-like effects, and represents an  
182 “avoidance” dimension of behavior in the LDT, while risk assessment clusters in a different group  
183 and represents a more “cognitive” aspect of anxiety-like behavior (Maximino *et al.* 2014).  
184 Moreover, exposure to the LDT induces a cortisol response in unstressed animals (Kysil *et al.*  
185 2017), suggesting that the conflict that is induced in the test is mildly stressful.

186 Behavioral effects of D-22 have been described in rodents; while by itself D-22 (0.01-0.32 mg/kg)  
187 was not able to change immobility time in the tail suspension test in mice, a screen for  
188 antidepressant-like effects, it produced a synergistic effect with fluvoxamine (Horton *et al.* 2013).  
189 Species- and strain-specific effects can be responsible for this lack of effect of D-22, as this drug  
190 (0.001-0.01 mg/kg) reduced immobility time in the forced swim test (another screen for  
191 antidepressant-like effects) in Wistar-Kyoto, but not Long Evans, rats (Marcinkiewicz and Devine  
192 2015). Although these effects are usually attributed to effects on serotonin clearance (Daws 2009b),  
193 it is not possible to discard an effect on norepinephrine.

194 D-22 blocks the uptake<sub>2</sub> monoamine transport system (Daws 2009b). Due to its low-affinity, high-  
195 capacity character, transporters in the uptake<sub>2</sub> system (OCT and PMAT) are “promiscuous”,  
196 participating in the elimination of most monoamines from synaptic and extrasynaptic sites (Hagan  
197 *et al.* 2011). Importantly, uptake<sub>2</sub> may represent a link between acute stress and monoaminergic  
198 neurotransmission (Maximino 2012), as these transporters are blocked by glucocorticoids (Hill *et al.*  
199 *et al.* 2011). While currently it is not known whether the effects reported in this experiment are due to  
200 serotonin, norepinephrine, dopamine, or histamine, there is some evidence for anxiety-like behavior

201 in zebrafish being increased by serotonin (Herculano and Maximino 2014) and catecholamines  
202 (Idalencio *et al.* 2017a).

203 Overall, these results suggest that uptake<sub>2</sub> is present in zebrafish, and that it functions as a mediator  
204 of stress and defensive behavior. These results point to novel avenues of investigation in the stress-  
205 monoamine interaction in anxiety, stress, and defensive behavior. Further studies are needed to  
206 better understand the mechanisms by which D-22 produces its behavioral effects.

207

## 208 **Significance statement**

209 Uptake<sub>2</sub> is a low-affinity, high-capacity transport system that contributes to the clearance of  
210 extraneuronal monoamines (mainly norepinephrine, serotonin, and dopamine) and is sensitive to  
211 glucocorticoids, therefore representing a putative mechanism of glucocorticoid-monoamine  
212 interaction. Since both monoamines and glucocorticoids have been implicated as mediators of  
213 stress-induced behavioral adjustments, this interaction can be relevant to understand the  
214 mechanisms through which stress influences neurochemical and behavioral responses. Here we  
215 report that, in zebrafish, the uptake<sub>2</sub> inhibitor decynium-22 increases dark preference and risk  
216 assessment in the light/dark test, an assay for anxiety-like behavior. Thus, uptake<sub>2</sub> appears to act as  
217 a modulator of defensive behavior, and its inhibition by, e.g., glucocorticoids could represent a  
218 mechanism through which stress produces fast neurobehavioral adjustments in vertebrates.

219

## 220 **Conflict of interests statement**

221 The authors declare no conflict of interest.



## 222 **Authors' contributions**

223 *Caio Maximino*: Conceptualization, Formal analysis, Funding acquisition, Methodology,  
224 Investigation, Data curation, Project Administration, Resources, Software, Supervision, Validation,  
225 Visualization, Writing – original draft.

226

## 227 **Data accessibility**

228 Data and analysis scripts for this work can be found at a GitHub repository  
229 (<https://github.com/lanec-unifesspa/decynium22>).

230

231 Abreu M. S., Giacomini A. C. V. V., Koakoski G., Piatto A. L. S., Barcellos L. J. G. (2017)  
232 Divergent effect of fluoxetine on the response to physical or chemical stressors in zebrafish.  
233 *PeerJ* **5**, e3330.

234 Conselho Nacional de Controle de Experimentação Animal - CONCEA (2017) *Diretriz brasileira*  
235 *para o cuidado e a utilização de animais para fins científicos e didáticos - DBCA. Anexo I.*  
236 *Peixes mantidos em instalações de instituições de ensino ou pesquisa científica.* Brasil.

237 Daws L. C. (2009a) Unfaithful neurotransmitter transporters: Focus on serotonin uptake and  
238 implications for antidepressant efficacy. *Pharmacol. Ther.* **121**, 89–99.

239 Daws L. C. (2009b) Unfaithful neurotransmitter transporters: Focus on serotonin uptake and  
240 implications for antidepressant efficacy. *Pharmacol. Ther.* **121**, 89–99.

241 Daws L. C., Koek W., Mitchell N. C. (2013) Revisiting serotonin reuptake inhibitors and the  
242 therapeutic potential of “uptake-2” in psychiatric disorders. *ACS Chem. Neurosci.* **4**, 16–21.

243 Demin K. A., Kolesnikova T. O., Khatsko S. L., Meshalkina D. A., Efimova E. V., Morzherin Y. Y.,  
244 Kalueff A. V. (2017) Acute effects of amitriptyline on adult zebrafish: Potential relevance to  
245 antidepressant drug screening and modeling human toxidromes. *Neurotoxicol. Teratol.* **62**, 27–  
246 33.

247 Fuzzen M. L. M. M., Kraak G. Van Der, Bernier N. J., Kraak G. Van Der, Bernier N. J. (2010)  
248 Stirring up new ideas about the regulation of the hypothalamic-pituitary-interrenal axis in  
249 zebrafish (*Danio rerio*). *Zebrafish* **7**, 349–358.

250 Gerlai R. (2014) Fish in behavior research: Unique tools with a great promise! *J. Neurosci.*  
251 *Methods* **234**, 54–58.

- 252 Giacomini A. C. V. V, Abreu M. S., Giacomini L. V., Siebel A. M., Zimmerman F. F., Rambo C. L.,  
253 Mocelin R., Bonan C. D., Piato A. L., Barcellos L. J. G. (2016) Fluoxetine and diazepam  
254 acutely modulate stress induced-behavior. *Behav. Brain Res.* **296**, 301–310.
- 255 Gorman J. M. (2002) Treatment of generalized anxiety disorder. *J. Clin. Psychiatry* **63 Suppl 8**, 17–  
256 23.
- 257 Hagan C. E., Schenk J. O., Neumaier J. F. (2011) The contribution of low-affinity transport  
258 mechanisms to serotonin clearance in synaptosomes. *Synapse* **65**, 1015–23.
- 259 Herculano A. M., Maximino C. (2014) Serotonergic modulation of zebrafish behavior: Towards a  
260 paradox. *Prog. Neuropsychopharmacol. Biol. Psychiatry* **55**, 50–66.
- 261 Hill J. E., Makky K., Shrestha L., Hillard C. J., Gasser P. J. (2011) Natural and synthetic  
262 corticosteroids inhibit uptake2-mediated transport in CNS neurons. *Physiol. Behav.* **104**, 306–  
263 311.
- 264 Horton R. E., Apple D. M., Owens W. A., Baganz N. L., Cano S., Mitchell N. C., Vitela M., Gould  
265 G. G., Koek W., Daws L. C. (2013) Decynium-22 enhances SSRI-induced antidepressant-like  
266 effects in mice: Uncovering novel targets to treat depression. *J. Neurosci.* **33**, 10534–10543.
- 267 Hothorn T., Hornik K., Wiel M. A. van de, Zeileis A. (2006) A Lego system for conditional  
268 inference. *Am. Statistician* **60**, 257–263.
- 269 Idalencio R., Alcântara Barcellos H. H. de, Kalichak F., Rosa J. G. S. da, Oliveira T. A., Abreu M.  
270 S. de, Fagundes M., et al. (2017a)  $\alpha$ -Methyltyrosine, a tyrosine hydroxylase inhibitor,  
271 decreases stress response in zebrafish (*Danio rerio*). *Gen. Comp. Endocrinol.* **252**, 236–238.
- 272 Idalencio R., Helena H., Barcellos D. A., Kalichak F., Gabriel J., Oliveira T. A., Abreu M. S. De, et  
273 al. (2017b)  $\alpha$ -methyltyrosine, a tyrosine hydroxylase inhibitor, decreases stress  
274 response in zebrafish (*Danio rerio*). *Gen. Comp. Endocrinol.*
- 275 Idalencio R., Kalichak F., Rosa J. G. S., Oliveira T. A. De, Koakoski G., Gusso D., Abreu M. S. De,  
276 et al. (2015) Waterborne risperidone decreases stress response in zebrafish. *PLoS One* **10**,  
277 e01040800.
- 278 Kitaichi K., Fukuda M., Nakayama H., Aoyama N., Ito Y., Fujimoto Y., Takagi K., Takagi K.,  
279 Hasegawa T. (2005) Behavioral changes following antisense oligonucleotide-induced  
280 reduction of organic cation transporter-3 in mice. *Neurosci. Lett.* **382**, 195–200.
- 281 Kysil E. V., Meshalkina D. A., Frick E. E., Echevarria D. J., Rosemberg D. B., Maximino C., Lima  
282 M. G., et al. (2017) Comparative analyses of zebrafish anxiety-like behavior using conflict-  
283 based novelty tests. *Zebrafish* **14**, 197–208.
- 284 Lawrence C. (2007) The husbandry of zebrafish (*Danio rerio*): A review. *Aquaculture* **269**, 1–20.
- 285 Leys C., Ley C., Klein O., Bernard P., Licata L. (2013) Detecting outliers: Do not use standard  
286 deviation around the mean, use absolute deviation around the median. *J. Exp. Soc. Psychol.* **49**,  
287 764–766.

- 288 Marcinkiewicz C. A., Devine D. P. (2015) Modulation of OCT3 expression by stress, and  
289 antidepressant-like activity of decynium-22 in an animal model of depression. *Pharmacol.*  
290 *Biochem. Behav.* **131**, 33–41.
- 291 Maximino C. (2012) *Serotonin and anxiety. Neuroanatomical, pharmacological, and functional*  
292 *aspects*. Springer, New York, NY.
- 293 Maximino C., Brito T. M. De, Dias C. A. G. D. M., Gouveia Jr. A., Morato S. (2010a) Scototaxis as  
294 anxiety-like behavior in fish. *Nat. Protoc.* **5**, 209–216.
- 295 Maximino C., Brito T. M. de, Silva A. W. B. da, Herculano A. M., Morato S., Gouveia Jr A. (2010b)  
296 Measuring anxiety in zebrafish: A critical review. *Behav. Brain Res.* **214**, 157–171.
- 297 Maximino C., Puty B., Benzecry R., Araújo J., Lima M. G., Jesus Oliveira Batista E. de, Renata de  
298 Matos Oliveira K., et al. (2013) Role of serotonin in zebrafish (*Danio rerio*) anxiety:  
299 Relationship with serotonin levels and effect of buspirone, WAY 100635, SB 224289,  
300 fluoxetine and para-chlorophenylalanine (pCPA) in two behavioral models.  
301 *Neuropharmacology* **71**, 83–97.
- 302 Maximino C., Silva A. W. B. da, Araújo J., Lima M. G., Miranda V., Puty B., Benzecry R., et al.  
303 (2014) Fingerprinting of psychoactive drugs in zebrafish anxiety-like behaviors. *PLoS One* **9**,  
304 e103943.
- 305 Mohammad F., Ho J., Lim C. L., Woo J. H., Poon D. J. J., Lamba B., Claridge-chang A. (2016)  
306 Concordance and incongruence in preclinical anxiety models: Systematic review and meta-  
307 analyses. *bioRxiv*.
- 308 Parra K. V, Adrian Jr J. C., Gerlai R. (2009) The synthetic substance hypoxanthine 3-N-oxide elicits  
309 alarm reactions in zebrafish (*Danio rerio*). *Behav. Brain Res.* **205**, 336–341.
- 310 Popović M. (2014) *Identification, characterization and ecotoxicological relevance of membrane*  
311 *transport protein families SLC21 and SLC22 in zebrafish (Danio rerio Hamilton, 1822)*.  
312 University of Dubrovnik.
- 313 Rahman Z., Ring R. H., Young K., Platt B., Lin Q., Schechter L. E., Rosenzweig-Lipson S., Beyer  
314 C. E. (2008) Inhibition of uptake 2 (or extraneuronal monoamine transporter) by  
315 normetanephrine potentiates the neurochemical effects of venlafaxine. *Brain Res.* **1203**, 68–78.
- 316 Rinkwitz S., Mourrain P., Becker T. S. (2011) Zebrafish: An integrative system for neurogenomics  
317 and neurosciences. *Prog. Neurobiol.* **93**, 231–243.
- 318 Rudnick G., Krämer R., Blakely R. D., Murphy D. L., Verrey F. (2014) The SLC6 transporters:  
319 Perspectives on structure, functions, regulation, and models for transporter dysfunction.  
320 *Pflugers Arch. Eur. J. Physiol.* **466**, 25–42.
- 321 Schildkraut J. J., Mooney J. J. (2004) Toward a rapidly acting antidepressant: The normetanephrine  
322 and extraneuronal monoamine transporter (uptake 2) hypothesis. *Am. J. Psychiatry* **161**, 909–  
323 911.

- 324 Soares M. C., Gerlai R., Maximino C. (2018) The integration of sociality, monoamines and stress  
325 neuroendocrinology in fish models: Applications in the neurosciences. *J. Fish Biol.* **93**, 170–  
326 191.
- 327 Speedie N., Gerlai R. (2008) Alarm substance induced behavioral responses in zebrafish (*Danio*  
328 *rerio*). *Behav. Brain Res.* **188**, 168–177.
- 329 Stewart A. M., Ullmann J. F. P., Norton W. H. J., Parker M. O., Brennan C. H., Gerlai R., Kalueff A.  
330 V (2015) Molecular psychiatry of zebrafish. *Mol. Psychiatry* **20**, 2–17.
- 331 Sullivan G. M., Coplan J. D., Kent J. M., Gorman J. M. (1999) The noradrenergic system in  
332 pathological anxiety: A focus on panic with relevance to generalized anxiety and phobias. *Biol.*  
333 *Psychiatry* **46**, 1205–1218.
- 334 Tran S., Chatterjee D., Gerlai R. (2014) Acute net stressor increases whole-body cortisol levels  
335 without altering whole-brain monoamines in zebrafish. *Behav. Neurosci.* **128**, 621–624.
- 336 Willner P. (1984) The validity of animal models of depression. *Psychopharmacology (Berl)*. **83**, 1–  
337 16.
- 338 Wu X., Kekuda R., Huang W., Fei Y. J., Leibach F. H., Chen J., Conway S. J., Ganapathy V. (1998)  
339 Identity of the organic cation transporter OCT3 as the extraneuronal monoamine transporter  
340 (uptake2) and evidence for the expression of the transporter in the brain. *J. Biol. Chem.* **273**,  
341 32776–32786.
- 342 Wulsch T., Grimberg G., Schmitt A., Painsipp E., Wetzstein H., Breitenkamp A. F. S., Gründemann  
343 D., et al. (2009) Decreased anxiety in mice lacking the organic cation transporter 3. *J. Neural*  
344 *Transm.* **116**, 689–697.
- 345 Zhou M., Engel K., Wang J. (2007) Evidence for significant contribution of a newly identified  
346 monoamine transporter (PMAT) to serotonin uptake in the human brain. *Biochem. Pharmacol.*  
347 **73**, 147–154.
- 348 Zhu H., Appel D. I., Gründemann D., Richelson E., Markowitz J. S. (2012) Evaluation of organic  
349 cation transporter 3 (SLC22A3) inhibition as a potential mechanism of antidepressant action.  
350 *Pharmacol. Res.* **65**, 491–496.  
351

352 Figure legends

353 Figure 1 – Decynium-22 increases anxiety-like behavior in the zebrafish LDT. (A) Scototaxis (time  
354 spent in the white compartment); (B) Transitions to the white compartment. (C) Duration of entries  
355 in the white compartment. (D) Risk assessment. (E) Erratic swimming. (F) Thigmotaxis. (G)  
356 Freezing duration.

357 The Hedges'  $g$  for 4 comparisons against the shared control 0 mg/kg are shown in the above  
358 Cumming estimation plots. The raw data is plotted on the upper axes. On the lower axes, mean  
359 differences are plotted as bootstrap sampling distributions. Each mean difference is depicted as a  
360 dot. Each 95% confidence interval is indicated by the ends of the vertical error bars. 5000 bootstrap  
361 samples were taken; the confidence interval is bias-corrected and accelerated. Letters indicate  
362 results from post-hoc tests; different letters indicate statistically significant differences ( $p < 0.05$ ).

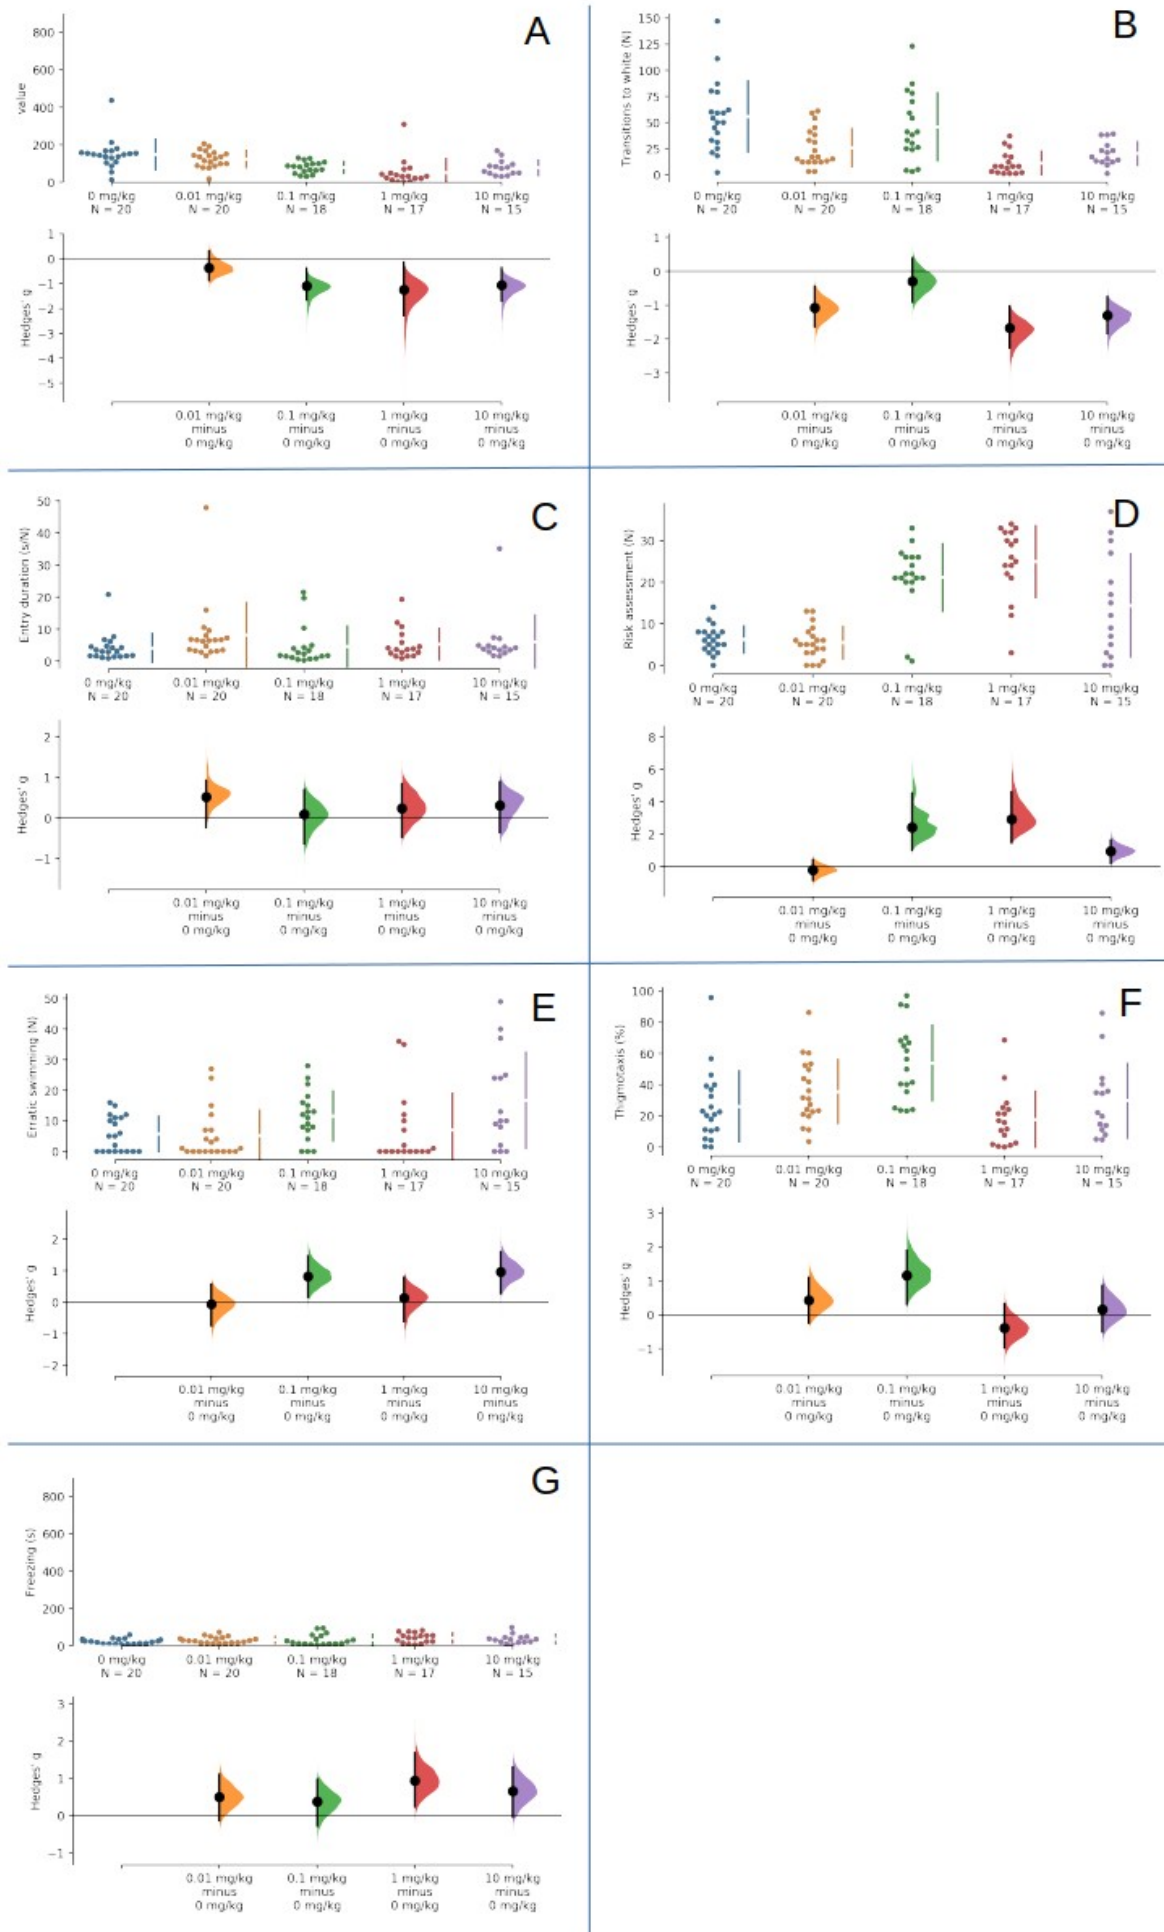

Source: https://www.biorxiv.org/content/10.1101/2021.01.14.426728v1.full.pdf
